# Supplementary material
Source: MDPI journal article supplement (https://www.mdpi.com/1424-2818/14/3/188)

## Supplementary information

### ***Photobacterium halophilum* sp. nov., a salt-loving bacterium isolated from marine sediment**

Minji Kim<sup>1</sup>, Ki-Eun Lee<sup>2</sup>, In-Tae Cha<sup>2\*</sup> and Soo-Je Park<sup>1\*</sup>

<sup>1</sup>Department of Biology, Jeju National University, Jeju 63243, Korea

<sup>2</sup>Microorganism Resources Division, National Institute of Biological Resources, Incheon 22689, Korea

**\*Correspondence:** itcha@korea.kr (I.-T.C.); sjpark@jejunu.ac.kr (S.-J.P.); Tel.: +82-32-590-7175 (I.-T.C.); +82-64-754-3524 (S.-J.P.); Fax: +82-32-590-7230 (I.-T.C.); +82-64-756-3541 (S.-J.P.)

**Keywords:** *Photobacterium halophilum*, tidal flat, sediment, genome, polyphasic, novel species

The GenBank/EMBL/DDBJ accession numbers for the whole-genome sequence and 16S gene sequence of strain GJ3<sup>T</sup> are CP073578, CP073579, CP073580 and MK828357, respectively.

**Figure S1.** Cell morphology of strain GJ3<sup>T</sup> as determined by transmission electron microscopy.  
transmission (bar = 0.5 $\mu$ m)

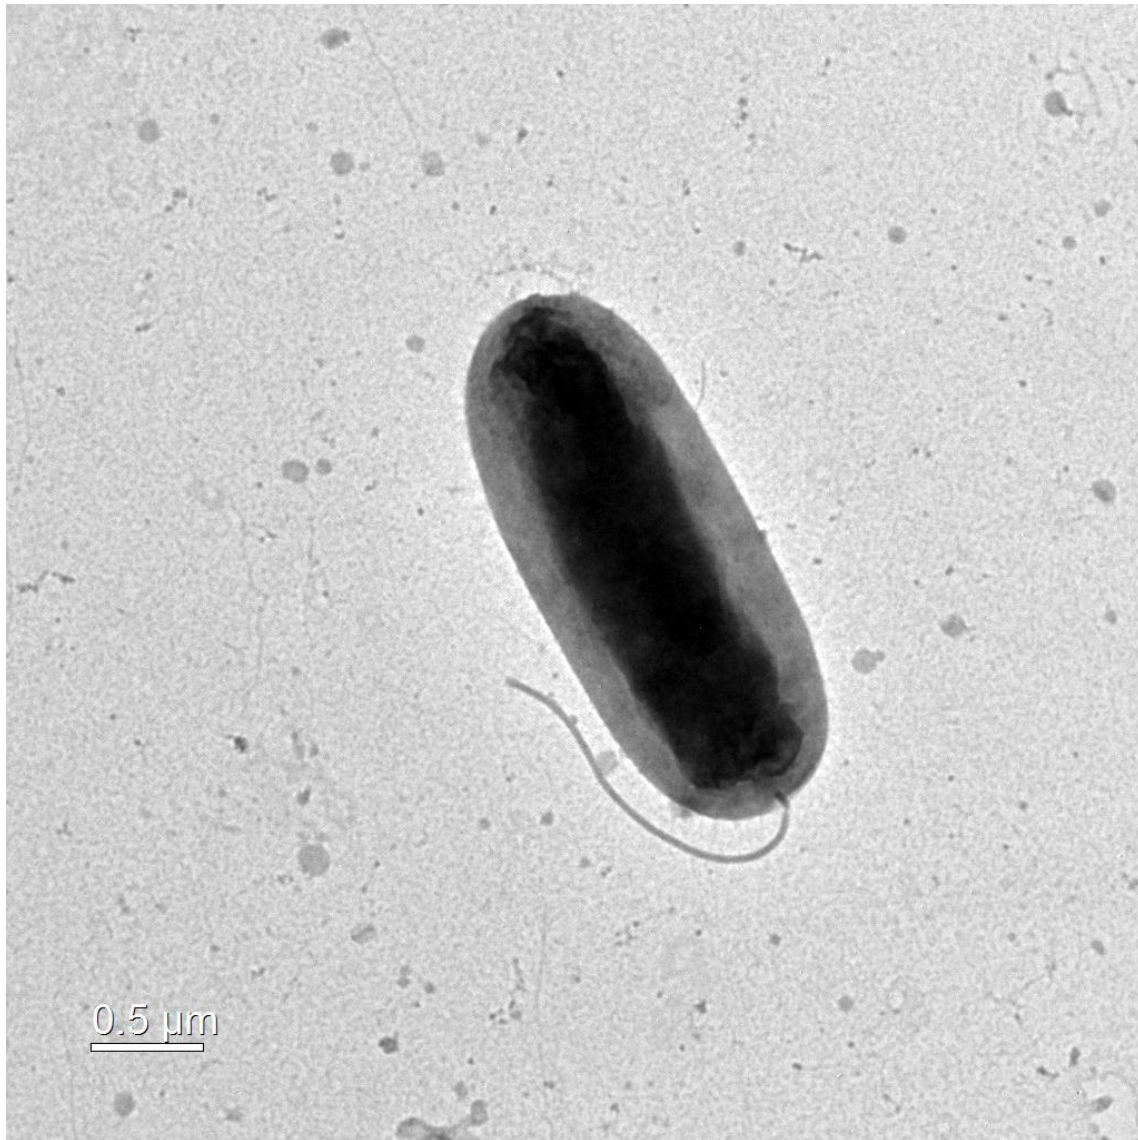

**Figure S2.** Two-dimensional thin-layer chromatography analysis of polar lipids from strain GJ3<sup>T</sup>.

Abbreviations: phosphatidylglycerol, PG; phosphatidylethanolamine, PE; phosphatidylcholine, PC; phospholipid, PL.

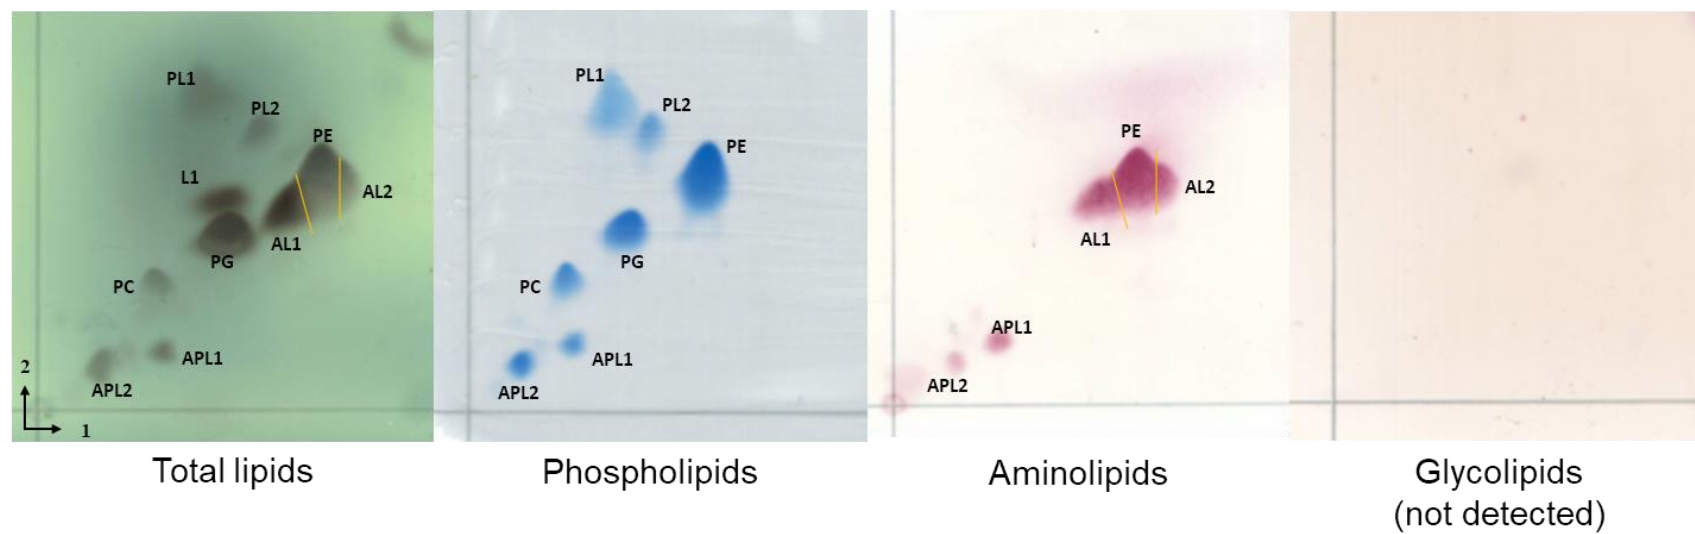

Supplement: s1 [file s1]
